# Supplementary material for: Congenital Diaphragmatic Eventration in the Neonatal Period: Systematic Review of the Literature and Report of a Rare Case Presenting with Gastrointestinal Disorders
Source: MDPI journal article supplement (doi:10.3390/pediatric15030041), 2023-07-26
Supplement: s1 [file s1]

**Table S1.** Characteristics of the reported cases.

| Author, Year         | Patients | Gestational age | Gender    | Symptoms onset time (days) | Clinical signs                                                            | Side            | Comorbidity                                               | Diagnosis method         | Treatment    | Patient outcomes | Recurrence  |
|----------------------|----------|-----------------|-----------|----------------------------|---------------------------------------------------------------------------|-----------------|-----------------------------------------------------------|--------------------------|--------------|------------------|-------------|
| Singh, 2020 [1]      | 9        | N/A             | N/A       | 6 (3–26)                   | N/A                                                                       | Mostly left     | N/A                                                       | N/A                      | Surgical     | Good             | N/A         |
| Heiwegen, 2020 [2]   | 17       | Median 38       | Male 8/17 | N/A                        | Dysmorphic characteristics                                                | Right/left 10/5 | N/A                                                       | Prenatal ultrasound      | Surgical     | One death        | Three cases |
| Hoshino, 2020 [3]    | 1        | 36              | Male      | 1                          | Respiratory failure                                                       | Left            |                                                           | Fluoroscopic examination | Surgical     | Good             | No          |
| Iskender, 2012 [4]   | 1        | 37              | Male      | 1                          | Peripheral cyanosis                                                       | Right           | Non-immune hydrops fetalis                                | MRI                      | Conservative | Good             | N/A         |
| Kadam, 2017 [5]      | 1        | 40              | Male      | 2                          | Respiratory distress                                                      | Left            | Gastric volvulus                                          | Chest skiagram           | Surgical     | Good             | No          |
| Kizilcan, 1993 [6]   | 1        | N/A             | Female    | N/A                        | Tachypnea, dyspnea, cyanosis                                              | Right           | N/A                                                       | Fluoroscopy              | Surgical     | Good             | No          |
| Lai, 2010 [7]        | 1        | Term            | Female    | 1                          | Bilious vomiting with abdominal distension                                | Right           | Long jejunal duplication, right upper-limb amelia         | Chest computed tomogram  | Surgical     | Good             | No          |
| Gunadi, 2020 [8]     | 1        | Term            | Male      | 16                         | Respiratory distress                                                      | Right           | No                                                        | Chest X-ray              | Surgical     | Good             | No          |
| Kasdallah, 2017 [9]  | 1        | Term            | Male      | 3                          | Distended abdomen with generalized contracture, bilious gastric residuals | Left            | No                                                        | Ultrasonography          | Surgical     | Good             | No          |
| Mitsiakos, 2022 [10] | 1        | 32              | Female    | 1                          | Respiratory distress                                                      | Right           | Congenital cardiac anomalies and parvovirus B19 infection | U/S and chest X-ray      | Surgical     | Death            |             |
| Revenu, 2004 [11]    | 1        | Term            | Male      | 1                          | Respiratory distress                                                      | Right           | Marfan syndrome                                           | U/S and chest X-ray      | Conservative | Death            |             |

|                        |   |      |        |    |                                                               |           |                                                               |                               |                      |       |     |
|------------------------|---|------|--------|----|---------------------------------------------------------------|-----------|---------------------------------------------------------------|-------------------------------|----------------------|-------|-----|
| Sallout, 2021 [12]     | 1 | Term | N/A    | 1  | Asymptomatic                                                  | Left      | No                                                            | U/S and chest X-ray           | Surgical at 6 months | Good  | No  |
| Tsukahara, 2001 [13]   | 1 | Term | Female | 1  | Respiratory distress                                          | Left      | No                                                            | Prenatal MRI                  | Conservative         | Good  |     |
| Yang, 2002 [14]        | 1 | Term | Female | 1  | Respiratory distress                                          | Left      | No                                                            | Chest X-ray                   | Surgical             | Good  | No  |
| Zankl, 2007 [15]       | 2 | 30   | Female | 1  | Floppy and cyanotic                                           | Right     | Non-immune hydrops fetalis                                    | Autopsy after death           | Conservative         | Death |     |
| Lewis, 2008 [16]       | 1 | Term | N/A    | 19 | History of poor suck, inconsolable cry, and hurried breathing | Left      | Wolff–Parkinson–White (WPW) syndrome                          | Chest X-ray                   | Conservative         | Good  | N/A |
| Shukla, 2012 [17]      | 1 | 42   | Male   | 1  | Respiratory distress since birth                              | Left      | Two gastric duplication cysts                                 | Ultrasonography of the thorax | Surgical             | Good  | No  |
| Sathanandam, 2016 [18] | 1 | 40   | Male   | 1  | Severely hypoxic                                              | Left      | Congenital cardiac anomalies, congenital diaphragmatic hernia | Computed tomography           | Surgical             | Good  | No  |
| Shehata, 2000 [19]     | 1 | Term | Male   | 18 | Respiratory problems                                          | Left      | Congenital skeletal anomalies                                 | Fluoroscopy                   | Surgical             | Good  | No  |
| Steiner, 2002 [20]     | 1 | 37   | Female | 1  | Hypoxemia                                                     | Bilateral | Persistent pulmonary hypertension, dysmorphic characteristics | Chest X-ray                   | Conservative         | Death |     |
|                        | 1 | 38   | Male   | 1  | Respiratory distress                                          | Right     | Anophthalmia, dysmorphic characteristics,                     | Chest X-ray                   | Surgical             | Death |     |

|                           |   |      |        |    |                                                                 |           |                                             |                                     |                     |                                                        |     |
|---------------------------|---|------|--------|----|-----------------------------------------------------------------|-----------|---------------------------------------------|-------------------------------------|---------------------|--------------------------------------------------------|-----|
|                           |   |      |        |    |                                                                 |           | cryptorchidism<br>bilateral inguinal hernia |                                     |                     |                                                        |     |
| Stratton, 1993 [21]       | 1 | 37   | Female | 1  | Cyanosis                                                        | Bilateral | Tetralogy of Fallot, Fryns syndrome         | U/S                                 | Surgical            | Death                                                  |     |
| Symbas, 1976 [22]         | 1 | Term | Female | 1  | Severe respiratory insufficiency                                | Right     | No                                          | N/A                                 | Surgical            | Good                                                   | No  |
|                           | 1 | Term | Female | 1  | Severe respiratory insufficiency                                | Right     | No                                          | N/A                                 | Surgical            | Good                                                   | No  |
|                           | 1 | Term | Female | 21 | Severe respiratory insufficiency                                | Right     | Right Erb's palsy, aortic stenosis          | N/A                                 | Surgical            | Death 5 wk postoperative due to severe aortic stenosis |     |
|                           | 1 | Term | Male   | 2  | Asymptomatic                                                    | Right     | Multiple other anomalies                    | N/A                                 | Conservative        | Good                                                   | N/A |
|                           | 1 | Term | Female | 20 | Upper respiratory infection                                     | Right     | N/A                                         | N/A                                 | Conservative        | Good                                                   | N/A |
|                           | 1 | Term | Female | 2  | Asymptomatic                                                    | Right     | Turner's syndrome, coarctation of aorta     | N/A                                 | Conservative        | Good                                                   | N/A |
|                           | 1 | Term | Male   | 28 | Nausea and vomiting                                             | Left      | No                                          | N/A                                 | Surgical at 4 years | Good                                                   |     |
|                           | 1 | Term | Male   | 7  | Failure to thrive and dyspnea, severe respiratory insufficiency | Bilateral | VSD and PDA                                 | N/A                                 | Surgical            | Good                                                   | No  |
| Takahashi, 2014 [23]      | 1 | 38   | Male   | 3  | Respiratory failure                                             | Bilateral | HLHS, omphalocele, PAGOD syndrome           | Fluoroscopy and computed tomography | Surgical            | Death                                                  |     |
| Martins, 2021 [24]        | 1 | Term | Female | 1  | Acute respiratory distress                                      | Right     | Scimitar syndrome                           | CT scan                             | Surgical            | N/A                                                    | N/A |
| Vijayaraghavan, 1998 [25] | 1 | Term | Female | 1  | Severe respiratory distress                                     | N/A       | N/A                                         | N/A                                 | N/A                 | N/A                                                    | N/A |

|                         |   |         |        |     |                                                                     |             |                                                                            |                                         |                    |                               |     |
|-------------------------|---|---------|--------|-----|---------------------------------------------------------------------|-------------|----------------------------------------------------------------------------|-----------------------------------------|--------------------|-------------------------------|-----|
| Wayne, 1973 [26]        | 1 | Term    | Female | 3   | Severe respiratory distress                                         | Bilateral   | CMV congenital infection                                                   | Chest X-ray                             | Conservative       | N/A                           | N/A |
| Byun, 2014 [27]         | 1 | Term    | Female | 1   | Vomiting, dyspnea                                                   | N/A         | N/A                                                                        | N/A                                     | Surgical           | Good                          | N/A |
|                         | 1 | Term    | Female | 5   | Vomiting, dyspnea                                                   | N/A         | N/A                                                                        | N/A                                     | Surgical           | Death                         | N/A |
| Snyder, 2014 [28]       | 5 | Preterm | -      | N/A | Respiratory distress                                                | Right (4/5) | Myotonic dystrophy                                                         | Chest radiographs                       | Surgical           | Good                          | No  |
| Rattan, 2001 [29]       | 1 | Term    | Female | 3   | Respiratory distress                                                | Right       | Lung agenesis                                                              | Chest radiographs, abdominal ultrasound | Surgical           | Death, 24 hours postoperative |     |
| Rais-Bahrami, 1996 [30] | 1 | 40      | Female | 1   | Respiratory distress                                                | Right       | Segment of the 9 and 10 ribs, hypoplastic right lung                       | Chest radiographs, ultrasound, autopsy  | Surgical           | Death                         |     |
| Sciorra, 1992 [31]      | 1 | 39      | Male   | 1   | Fetal growth retardation, dysmorphic features, respiratory distress | N/A         | Trisomy 5 mosaicism                                                        | N/A                                     | Surgical           | Death                         |     |
| Yang, 2005 [32]         | 1 | 41      | Female | 1   | Cyanosis                                                            | Right       | Right lung hypoplasia                                                      | Chest radiographs, CT, prenatal         | Surgical           | Good                          | No  |
| Poole, 1976 [33]        | 1 | Term    | Female | 1   | Respiratory distress                                                | Left        | Cleft lower sternum and small ventral hernia, congenital heart disease     | Chest radiographs, autopsy              | Surgical           | Death 24 h postoperative      |     |
| Kapoor, 2010 [34]       | 1 | 33+5    | Male   | 1   | Respiratory distress, hypotonia                                     | Right       | Myotonic dystrophy                                                         | Chest radiographs, ultrasound           | Conservative       | Death at 40 days of life      |     |
| Pearl, 1972[35]         | 1 | 40      | Male   | 1   | Tachypnoia, cyanosis                                                | Left        | Extralobar sequestration with several bronchioles and pulmonary parenchyma | Chest radiographs                       | Surgical           | Good                          | No  |
| Renault, 2008 [36]      | 1 | 39      | Male   | 1   | Generalized hypotonia, respiratory distress                         | Bilateral   | No                                                                         | Chest radiographs                       | Surgical plication | Death at 11 months            |     |

|                    |   |         |        |     |                           |           |                                                                                    |                                                               |          |                                    |     |
|--------------------|---|---------|--------|-----|---------------------------|-----------|------------------------------------------------------------------------------------|---------------------------------------------------------------|----------|------------------------------------|-----|
|                    | 1 | 38      | Male   | 1   | Birth asphyxia            | Bilateral | No                                                                                 | Chest radiographs                                             | Surgical | Bronchial and pulmonary infections | No  |
| Moerman, 1987 [37] | 1 | 34+5    | Male   | 1   | Hypotonia                 | Bilateral | X-linked centronuclear myopathy                                                    | Autopsy                                                       | N/A      | Death after 30 min resuscitation   |     |
|                    | 1 | 42      | Female | 1   | Asphyxia                  | Bilateral | Pulmonary hypoplasia, myotonic dystrophy                                           | Autopsy                                                       | N/A      | Death                              |     |
| Moccia, 1981 [38]  | 1 | Preterm | N/A    | 1   | Respiratory distress      | Right     | Type 3 truncus arteriosus, duodenal atresia                                        | Chest radiographs, ultrasound                                 | Surgical | Death                              |     |
|                    | 1 | N/A     | N/A    | 21  | Respiratory distress      | Right     | N/A                                                                                | Chest radiographs, ultrasound, radionuclide liver–spleen scan | N/A      | Good                               | N/A |
| Moazamm, 1979 [39] | 1 | N/A     | Female | 14  | Respiratory distress      | Bilateral | N/A                                                                                | N/A                                                           | Surgical | Good                               | No  |
| Gupta, 2006 [40]   | 1 | 35      | Female | 1   | Poor respiratory effort   | Right     | Pulmonary hypoplasia, mitochondrial dysfunction                                    | Autopsy                                                       | Surgical | Death at 23 h                      |     |
|                    | 1 | 35      | Female | 1   | Repsiratory distress      | Bilateral | Absence of 12th rib, pulmonary hypoplasia, mitochondrial dysfunction               | Chest radiographs, autopsy                                    | N/A      | Death at 26 days                   |     |
|                    | 1 | 35      | Male   | N/A | N/A                       | Left      | Type 3 truncus arteriosus and ventricular septal defect, mitochondrial dysfunction | N/A                                                           | Surgical | Death at 55 days                   |     |
| Merten, 1982 [41]  | 1 | N/A     | Female | 1   | Mild cyanosis, tachypnoia | Left      | Trisomy 13–15                                                                      | Chest radiographs, autopsy                                    | N/A      | Death at 26 days                   |     |

|                      |    |      |                   |     |                                                                         |                       |                                                                                    |                                               |          |                                                                   |         |
|----------------------|----|------|-------------------|-----|-------------------------------------------------------------------------|-----------------------|------------------------------------------------------------------------------------|-----------------------------------------------|----------|-------------------------------------------------------------------|---------|
|                      | 1  | N/A  | Male              | 3   | Respiratory distress                                                    | Bilateral             | Short-arm translocation of chromosome 22                                           | Chest radiographs                             | N/A      | Good                                                              | No      |
|                      | 1  | N/A  | Male              | 1   | Respiratory distress                                                    | Bilateral             | Fetal alcohol syndrome                                                             | Chest radiographs, surgery                    | Surgical | Death at 3 months of age (massive aspiration)                     |         |
|                      | 1  | N/A  | Female            | 1   | Mild respiratory distress                                               | Right                 | Aural pinna, nasal septum malformation, and bilateral hypoplasia of the 5th finger | Chest radiographs, ultrasound                 | N/A      | At 4 months of age developmental delay, mild hypertension         | N/A     |
| Meine, 1974 [42]     | 1  | N/A  | Female            | N/A | Respiratory distress                                                    | Left                  | Multiple congenital anomalies                                                      | Chest radiographs                             | Surgical | Transient hypertension                                            | Yes     |
| Macayran, 2002[43]   | 1  | 35+2 | Female            | 1   | Respiratory distress                                                    | Right                 | PAGOD syndrome                                                                     | Chest radiographs, ultrasound, CT             | Surgical | Death at 6 months                                                 |         |
| Kozlov, 2015 [44]    | 35 | N/A  | Male/female 20/15 | N/A | Respiratory disorders                                                   | Right/left side 24/11 | 13 cases with cardiac malformations and genetic malformations                      | Chest radiographs                             | Surgical | Good                                                              | 2 cases |
| Joshi, 2018 [45]     | 1  | Term | Female            | 4   | Breathing difficulty, subcostal retractions, reduced breath sounds left | Left                  | No                                                                                 | Chest radiographs                             | Surgical | Right-sided evantration postoperative, tract infections recurrent | No      |
| Saravanan, 2015 [46] | 1  | N/A  | Female            | 6   | Respiratory distress                                                    | Bilateral             | N/A                                                                                | Chest and abdomen radiographs, ultrasound, CT | Surgical | Second plication on the right side, discharged after 5 days       | No      |
| Heo, 2017 [47]       | 1  | 36+5 | Male              | 1   | Shallow excursion, weak diaphragmatic motion                            | Right                 | Marfan, dysmorphic features, dilated aortic                                        | Chest radiographs, ultrasound                 | N/A      | Good                                                              | N/A     |

|                      |   |      |        |    |                                                                                                                                                                                          |       |                                                                                                          |                         |          |                                                                                                                              |    |
|----------------------|---|------|--------|----|------------------------------------------------------------------------------------------------------------------------------------------------------------------------------------------|-------|----------------------------------------------------------------------------------------------------------|-------------------------|----------|------------------------------------------------------------------------------------------------------------------------------|----|
|                      |   |      |        |    |                                                                                                                                                                                          |       | root, hydronephrosis, hydroureter right kidney, dilated cisterna magna                                   |                         |          |                                                                                                                              |    |
| Blanluet, 2010 [48]  | 1 | Term | Male   | 10 | N/A                                                                                                                                                                                      | Right | Prune-belly sequence                                                                                     | Radiographs, ultrasound | Surgical | Good                                                                                                                         | No |
| Garbaccio, 1972 [49] | 1 | Term | Female | 2  | Respiratory distress, tachypnoea, cyanosis                                                                                                                                               | Left  | No                                                                                                       | Radiograph              | Surgical | Good                                                                                                                         | No |
|                      | 1 | Term | Female | 1  | Tachypnoea in birth, bilateral atelectasis at birth, small feeding in upright position, fatigue, poor weight gain, atrophy and paralysis of the muscles in right arm, thoracic scoliosis | Right | N/A                                                                                                      | Radiograph, fluoroscopy | Surgical | Atelectatic lung, expansion after 4 postoperative days; 4 years normal lung function but limited function of right extremity | No |
|                      | 1 | 41   | Male   | 7  | Respiratory distress, cyanosis which worsened with feedings, mild Erb's palsy of the left side, and a right phrenic nerve paralysis. Difficulty in delivery of head and left shoulder    | Right | Erb's palsy left-sided                                                                                   | Radiograph, fluoroscopy | Surgical | Good                                                                                                                         | No |
|                      | 1 | 43   | Female | 6  | Respiratory distress, tachypnoea, cyanosis, heart sounds on the right, breath sound decreased on left, during feeding worst                                                              | Left  | Phocomelia left and right, complete agenesis left phrenic nerve, agenesis of left lower lobe of the lung | Radiograph, fluoroscopy | Surgical | Good                                                                                                                         | No |

|                      |   |         |        |    |                                                                                    |           |                                                                                 |                                                                                                |              |                                                      |     |
|----------------------|---|---------|--------|----|------------------------------------------------------------------------------------|-----------|---------------------------------------------------------------------------------|------------------------------------------------------------------------------------------------|--------------|------------------------------------------------------|-----|
| Falade, 1992 [50]    | 1 | Term    | Female | 10 | Respiratory distress, vomiting and refusing feeds, decreased breath sound on right | Right     | Abnormal liver configuration                                                    | Radiograph, autopsy, right-sided diagnostic chest tap, right closed thoracostomy tube drainage | Conservative | Death 14 days of live                                |     |
| Ertan, 2010 [51]     | 1 | N/A     | Female | 1  | Asymptomatic                                                                       | Right     | Multiple congenital abnormalities                                               | prenatal ultrasound CDH, chest radiograph, CT                                                  | Surgical     | N/A                                                  | N/A |
|                      | 1 | Preterm | Female | 1  | Prenatal diagnosis                                                                 | Right     | Omphalocele, skeletal anomalies                                                 | Prenatal ultrasound, chest radiographs                                                         | Surgical     | Good                                                 | N/A |
| Elberg, 1989 [52]    | 1 | 36      | Male   | 1  | Severe respiratory distress                                                        | Bilateral | Hypoplastic lungs                                                               | X-ray                                                                                          | Conservative | Death 10 hours                                       | No  |
|                      | 1 | 36      | Male   | 1  | Severe respiratory distress                                                        | Bilateral | Hypoplastic lungs                                                               | X-ray                                                                                          | Conservative | Death 14 days of live                                |     |
| Ekkelkamp, 1983 [53] | 1 | 37      | Female | 1  | Birth asphyxia                                                                     | Bilateral | No                                                                              | Fluoroscopy                                                                                    | Surgical     | Good                                                 | No  |
| Rana, 2021 [54]      | 1 | 37      | Male   | 1  | No symptoms, prenatal diagnosis                                                    | Left      | No                                                                              | Fetal ultrasound, fetal MRI, postnatal CT                                                      | Surgical     | Good                                                 | N/A |
| Dalvi, 1990 [55]     | 1 | N/A     | Female | 1  | Tachypnoea                                                                         | Right     | No                                                                              | X-ray, CT scan                                                                                 | Surgical     | Good                                                 | N/A |
| Krasemann, 2020 [56] | 1 | N/A     | Male   | 1  | Cyanotic                                                                           | Right     | Marfan syndrome, clockwise rotated heart, valvar disfuncion, muscular hypotonia | X-ray                                                                                          | Surgical     | Death at 10 weeks                                    |     |
| Comstock, 1986 [57]  | 1 | 38      | N/A    | 1  | Respiratory distress                                                               | N/A       | Trisomy 18, horseshoe kidney                                                    | Fetal ultrasound at 35 w                                                                       | N/A          | Death at 2 days                                      |     |
| Wenger, 1997 [58]    | 1 | N/A     | Male   | 1  | Apnoea, poor respiratory effort, feeding problems                                  | Left      | Chromosomal anomalies                                                           | X-ray, fluoroscopy                                                                             | Conservative | Death at 2 months at home                            |     |
| Donahue, 2017 [59]   | 1 | 32+3    | Male   | 1  | Respiratory distress                                                               | Left      | Chromosomal anomalies                                                           | X-ray                                                                                          | Surgical     | Respiratory insufficiency progressing to respiratory | N/A |



|                     |   |         |        |   |                                          |           |                                                                       |                                    |          |                                  |                                             |
|---------------------|---|---------|--------|---|------------------------------------------|-----------|-----------------------------------------------------------------------|------------------------------------|----------|----------------------------------|---------------------------------------------|
|                     |   |         |        |   |                                          |           |                                                                       |                                    |          | failure tracheostomy at 9 months |                                             |
| Othersen, 1977 [60] | 1 | Preterm | Male   | 1 | Respiratory distress                     | Right     | N/A                                                                   | X-ray, fluoroscopy, liver scan     | Surgical | Death at 70th day                |                                             |
|                     | 1 | N/A     | Male   | 9 | Mild respiratory distress                | Right     | N/A                                                                   | X-ray, intraoperative              | Surgical | Good                             | N/A                                         |
|                     | 1 | Preterm | N/A    | 1 | Respiratory distress                     | Left      | Patent ductus arteriosus (PDA)                                        | X-ray                              | Surgical | Good                             | Small diaphragmatic elevation at 9.5 months |
| Ein, 1997 [61]      | 1 | 39      | Male   | 1 | N/A                                      | Right     | Anal agenesis with rectal and sigmoid atresia                         | X-ray                              | N/A      | N/A                              | -                                           |
| Berdon, 1968 [62]   | 1 | Term    | N/A    | 1 | Respiratory distress                     | Right     | Bilateral pulmonary hypoplasia                                        | X-ray, autopsy                     | Surgical | Death                            | -                                           |
|                     | 1 | Term    | N/A    | 1 | Respiratory distress                     | Left      | Bilateral pulmonary hypoplasia                                        | X-ray, autopsy                     | Surgical | Death                            | -                                           |
|                     | 1 | Term    | N/A    | 1 | Respiratory distress                     | Right     | Unilateral pulmonary hypoplasia                                       | X-ray                              | Surgical | Death                            | No                                          |
| Baharin, 2020 [63]  | 1 | 34      | Female | 1 | Repsiratory distress                     | Right     | Poland syndrome, Sprengel's deformity, hypoplasia of right chest wall | X-ray, ultrasound, CT              | Surgical | Assymetry of the chest wall      | No                                          |
| Buxi, 1996 [64]     | 1 | Term    | Male   | 1 | Respiratory distress                     | Right     | Aplasia of the right lung                                             | X-ray, CT scan                     | Surgical | Death                            | -                                           |
| Iliff, 1982 [65]    | 1 | 41      | Male   | 1 | Tachypnoea                               | Central   | Pericardial effusion                                                  | X-ray, fluoroscopy, intraoperative | Surgical | Good                             | N/A                                         |
| Rao, 2016 [66]      | 1 | Term    | Female | 2 | Respiratory distress, periferic cyanosis | Bilateral | No                                                                    | X-ray, CT scan                     | Surgical | Good                             | N/A                                         |

|                     |   |      |        |     |                                                    |           |                                                              |                                |              |                                           |     |
|---------------------|---|------|--------|-----|----------------------------------------------------|-----------|--------------------------------------------------------------|--------------------------------|--------------|-------------------------------------------|-----|
| Andijani, 2019 [67] | 1 | 38   | Male   | 1   | Respiratory distress                               | Left      | PDAC syndrome/microphthalmic syndrome 9                      | X-ray, CT, fluoroscopy         | Conservative | Ventilator depended tracheostomy          | N/A |
| Baker, 2023 [68]    | 1 | 38   | Female | 1   | Severe respiratory failure, pulmonary hypertension | Bilateral | King–Denborough syndrome (KDS), central core disease (CCD)   | Fetal MRI, CT, autopsy         | Conservative | Death at 5 months                         | -   |
| Chitayat, 2007 [69] | 1 | 38   | Female | 1   | -                                                  | Left      | PDAC syndrome                                                | Fetal ultrasound 24 w, autopsy | N/A          | Death shortly after delivery              | -   |
|                     | 1 | Term | Male   | 1   | -                                                  | Right     | PDAC syndrome                                                | Fetal ultrasound 34 w          | N/A          | Death shortly after delivery              | -   |
|                     | 1 | 31+6 | Female | 1   | Repsiratory distress                               | Bilateral | Multiple congenital abnormalities                            | Autopsy                        | N/A          | Death at 50 min of life                   | -   |
|                     | 1 | 41   | Male   | 2   | Respiratory distress                               | Left      | Multiple congenital abnormalities                            | X-ray, CT                      | Surgical     | Delayed development and truncal hypotonia | No  |
|                     | 1 | 36   | Male   | 1   | Cyanotic                                           | Right     | Multiple congenital abnormalities                            | X-ray, autopsy                 | N/A          | Death at 3 days of life                   | -   |
| Kosho, 2006 [70]    | 1 | 36+2 | Male   | 1   | Heart and respiratory failure                      | N/A       | Trisomy 18, double outlet right ventricle (DORV)             | N/A                            | N/A          | Death                                     | -   |
|                     | 1 | 31+4 | Male   | 1   | Respiratory failure                                | N/A       | Trisomy 18, IUGR, lung hypoplasia, trancheosophageal fistula | N/A                            | N/A          | Death at 1 day of life                    |     |
|                     | 1 | 38+3 | Female | N/A | N/A                                                | N/A       | Trisomy 18, IUGR                                             | N/A                            | N/A          | Good                                      | N/A |

|                     |   |     |        |            |                                   |           |                                                                                                       |                                   |              |                                         |     |
|---------------------|---|-----|--------|------------|-----------------------------------|-----------|-------------------------------------------------------------------------------------------------------|-----------------------------------|--------------|-----------------------------------------|-----|
| Robinson, 1980 [71] | 1 | 35  | Male   | 16         | Respiratory distress              | Bilateral | No                                                                                                    | X-ray                             | Surgical     | Postoperative X-ray had minimal changes | N/A |
|                     | 1 | N/A | Male   | 7          | Mild respiratory distress         | Bilateral | Hypospadias skeletal anomalies, VSD, valvular pulmonic stenosis                                       | X-ray                             | Conservative | Good                                    | No  |
|                     | 1 | N/A | Male   | 1          | Respiratory distress              | Bilateral | PDA, aortic coartation, pulmonary hypoplasia                                                          | Autopsy                           | N/A          | Death                                   |     |
| Miyano, 2015 [72]   | 1 | 34  | Male   | 1          | N/A                               | Right     | Unilateral pulmonary agenesis, oesophageal atresia and tracheoesophageal fistula                      | Fetal ultrasound 22 w, X-ray      | Surgical     | Good                                    | No  |
| Arts, 2020 [73]     | 1 | 38  | Female | 1          | Persistent pulmonary hypertension | Bilateral | CAKUT syndrome, pulmonary hypoplasia, congenital alveolar dysplastic pattern                          | Autopsy, fetal ultrasound 16 week |              | Death at 1 day of life                  | -   |
|                     | 1 | 35  | Female | Stillbirth |                                   | Bilateral | Mutation in PBX1, small kidneys and bilateral ureteric dilatation, a bell-shaped chest, and pulmonary | Fetal ultrasound 16 w, autopsy    |              | Stillbirth                              | -   |

|                     |   |    |        |   |                                                       |           |                                                                                                    |                                                                                        |              |                                          |                                                          |
|---------------------|---|----|--------|---|-------------------------------------------------------|-----------|----------------------------------------------------------------------------------------------------|----------------------------------------------------------------------------------------|--------------|------------------------------------------|----------------------------------------------------------|
|                     |   |    |        |   |                                                       |           | hypoplasia,<br>sex reversal<br>46XY                                                                |                                                                                        |              |                                          |                                                          |
| Wexler, 1976 [74]   | 1 | 39 | Female | 1 | Hypoxia                                               | Bilateral | No                                                                                                 | Fluoroscopy, autopsy                                                                   | Surgical     | Good                                     |                                                          |
|                     | 1 | 37 | Female | 1 | Respiratory distress                                  | Right     | No                                                                                                 | X-ray, fluoroscopy                                                                     | Conservative | Good                                     | Persistent<br>elevation of<br>the right<br>hemidiaphragm |
|                     | 1 | 40 | Female | 1 | Cyanosis                                              | Bilateral | Trisomy 13–15                                                                                      | X-ray, autopsy                                                                         | N/A          | Death at 2 days<br>of life               | -                                                        |
|                     | 1 | 34 | Female | 1 | Asymptomatic                                          | Bilateral | Trisomy 18,<br>hypoplastic<br>lungs                                                                | X-ray, autopsy                                                                         | N/A          | Death at 4 days<br>of life               |                                                          |
|                     | 1 | 35 | Male   | 1 | N/A                                                   | Bilateral | Partial D<br>trisomy                                                                               | X-ray                                                                                  | N/A          | N/A                                      |                                                          |
|                     | 1 | 40 | Male   | 1 | Respiratory distress                                  | Bilateral | Tricuspid<br>atresia,<br>hypoplastic<br>right ventricle                                            | X-ray                                                                                  | Surgical     | Death                                    |                                                          |
|                     | 1 | 40 | Male   | 1 | Diffuse hypotonia, mild<br>cyanosis                   | Right     | Facial diplegia,<br>bilateral<br>ptosis,<br>diminished<br>sucking reflex,<br>myotonic<br>dystrophy | X-ray                                                                                  | N/A          | Multiple<br>atelectasis and<br>pneumonia | N/A                                                      |
| Leyten, 1992 [75]   | 1 | 37 | Male   | 1 | Upwards displacement<br>of the right<br>hemidiaphragm | Right     | Facial<br>dysmorphies                                                                              | Intraoperative                                                                         | Surgical     | Good                                     | No                                                       |
| Danhaive, 2007 [76] | 1 | 40 | Female | 1 | Respiratory failure                                   | Right     | No                                                                                                 | A chest radiogram,<br>laparotomy                                                       | Surgical     | Death at 2<br>months of age              |                                                          |
| Antoniou, 2012 [77] | 1 | 37 | Female | 1 | Respiratory failure                                   | Left      | Cystic<br>mesenchymal<br>hamartoma                                                                 | Prenatal ultrasound,<br>chest radiography,<br>upper gastrointestinal<br>contrast study | Surgical     | N/A                                      | Yes                                                      |

|                       |   |      |        |     |                                  |           |                                                                             |                                                                      |                              |                                                                                |    |
|-----------------------|---|------|--------|-----|----------------------------------|-----------|-----------------------------------------------------------------------------|----------------------------------------------------------------------|------------------------------|--------------------------------------------------------------------------------|----|
| Verloes, 2010 [78]    | 1 | Term | Male   | 1   | Neonatal respiratory distress    | Left      | Complete agenesis of the left diaphragm and absence of the left pericardium | Routine prenatal ultrasound scan                                     | Surgical                     | Good                                                                           | No |
| Inoue, 2020 [79]      | 1 | 39   | Male   | 3   | Asymptomatic                     | Left      | No                                                                          | Fetal ultrasonography, echocardiography, chest radiography, chest CT | Surgical at 8 months of life | Good                                                                           |    |
|                       | 1 | 38   | Male   | 1   | Neonatal respiratory distress    | Left      | No                                                                          | Fetal ultrasonography, prenatal MRI, chest radiograph, chest CT      | Surgical at day 21           | Good                                                                           | No |
| Şahin, 2014 [80]      | 1 | Term | Female | N/A | Neonatal respiratory distress    | Right     | Chromosomal anomalies                                                       | Fluoroscopy                                                          | N/A                          | Developmental retardation and intellectual disability at an age of 7 years old | No |
| Mahalingam, 2020 [81] | 1 | 24   | N/A    | N/A | N/A                              | Left      | N/A                                                                         | Fetal MRI                                                            | Surgical                     | Death 1 month afer surgery                                                     |    |
|                       | 1 | 21   | N/A    | N/A | N/A                              | Left      | N/A                                                                         | Fetal MRI                                                            | Surgical                     | Doing well at 2 months follow-up                                               | No |
|                       | 1 | 32   | N/A    | N/A | N/A                              | Left      | N/A                                                                         | Fetal MRI                                                            | Conservative                 | Survived                                                                       | No |
|                       | 1 | 21   | N/A    | N/A | N/A                              | Left      | N/A                                                                         | Fetal MRI                                                            | Conservative                 | Survived                                                                       |    |
| Rodgers, 1986 [82]    | 1 | 39   | Female | 2   | Severe respiratory insufficiency | Bilateral | None                                                                        | Chest radiograph, chest fluoroscopy, and a radionuclide liver scan   | Surgical                     | Good                                                                           | No |
|                       | 1 | 39   | Female | 1   | Severe respiratory insufficiency | Bilateral | None                                                                        | Chest radiograph, U/S                                                | Surgical                     | Good                                                                           | No |
|                       | 1 | 29   | Male   | 1   | Severe respiratory insufficiency | Bilateral | None                                                                        | Chest radiograph, U/S                                                | Surgical                     | Recurrent episodes of pneumonia. At age 14 months, requires intermittent       | No |

|                        |   |         |        |     |                                       |           |                                                                                                                         |                                                                                                        |              |                          |    |
|------------------------|---|---------|--------|-----|---------------------------------------|-----------|-------------------------------------------------------------------------------------------------------------------------|--------------------------------------------------------------------------------------------------------|--------------|--------------------------|----|
|                        |   |         |        |     |                                       |           |                                                                                                                         |                                                                                                        |              | ventilatory support      |    |
| Zainudin, 2016 [83]    | 1 | Term    | Male   | 10  | Significant respiratory insufficiency | Right     | None referred                                                                                                           | U/S, CT                                                                                                | Surgical     | Good                     | No |
| Hasegawa, 1994 [84]    | 1 | 37      | Female | 1   | Respiratory distress                  | Right     | None                                                                                                                    | Fetal U/S, chest X-ray                                                                                 | Surgical     | Good                     | No |
| N'guessen, 1984 [85]   | 1 | Preterm | Male   | N/A | N/A                                   | Bilateral | Cloacal exstrophy, closed sacral meningocele and "butterfly" anomalies of T-5 to T-11 vertebrae                         | Chest X-ray, fluoroscopy                                                                               | N/A          | Death aged 23 days       |    |
| Takahashi, 2013 [86]   | 1 | Term    | Male   | 1   | Respiratory distress                  | Right     | None                                                                                                                    | Chest radiography and CT                                                                               | Surgical     | Good                     | No |
| Sun, 2016 [87]         | 1 | 38      | Female | 1   | Respiratory insufficiency             | Right     | Asparagine synthetase deficiency (ASNSD)                                                                                | Chest X-ray                                                                                            | Conservative | Death at 11 days of life |    |
| Ahmed, 1998 [88]       | 1 | 39      | Male   | 1   | Respiratory insufficiency             | Bilateral | None                                                                                                                    | Chest X-ray, U/S                                                                                       | Surgical     | Good                     | No |
|                        | 1 | 39      | Female | 1   | Respiratory insufficiency, cyanosis   | Bilateral | None                                                                                                                    | Chest X-ray                                                                                            | Surgical     | Good                     | No |
| DiChiacchio, 2018 [89] | 1 | 37      | Male   | 1   | Asymptomatic                          | Left      | Extrapulmonary versus intrapulmonary sequestration with a systemic feeding vessel from the left internal mammary artery | Routine plain radiograph was obtained for confirmation of umbilical vein catheter placement, chest U/S | Conservative | Good                     | No |

|                            |   |    |        |                    |                           |           |                                                               |                                                         |              |                      |  |
|----------------------------|---|----|--------|--------------------|---------------------------|-----------|---------------------------------------------------------------|---------------------------------------------------------|--------------|----------------------|--|
| Park, 1992 [90]            | 1 |    | Male   | 5                  | Vomiting, dyspnea         | Left      | Gastric volvulus                                              | Abdominal radiographs and upper gastrointestinal series | Surgical     |                      |  |
| Huang, 2021 [91]           | 1 | 36 | Female | 1                  | Respiratory insufficiency | Bilateral | Dextrocardia, left superior vena cava, omphaloceles           | Abdominal radiographs                                   | N/A          | Death                |  |
| Veiga-Fernández, 2020 [92] | 1 | 37 | Female | Prenatal diagnosis | Marfanoid habitus         | Right     | Early-onset Marfan syndrome (EOMS)                            | Fetal U/S, fetal MRI                                    | Conservative | Death after 3 months |  |
| Jeanty, 2007 [93]          | 1 | 34 | Female | Stillborn          |                           | Central   | Pericardial effusion, multiple cardiac and skeletal anomalies | Prenatal U/S                                            | Stillborn    |                      |  |

1. Singh, G.; Rai, R.K.; Pant, N.; Wakhlu, A. Study of Thoracoscopic Repair of Diaphragmatic Eventration in Children: A Case Series. *J Laparoendosc Adv Surg Tech A* **2020**, *30*, 692-694, doi:10.1089/lap.2019.0805.
2. Heiwegen, K.; van Heijst, A.F.; Daniels-Scharbatke, H.; van Peperstraten, M.C.; de Blaauw, I.; Botden, S.M. Congenital diaphragmatic eventration and hernia sac compared to CDH with true defects: a retrospective cohort study. *European journal of pediatrics* **2020**, *179*, 855-863, doi:10.1007/s00431-020-03576-w.
3. Hoshino, Y.; Arai, J. Diaphragm ultrasound examination for congenital diaphragmatic eventration in two premature neonates. *BMJ case reports* **2020**, *13*, doi:10.1136/bcr-2019-232813.
4. Iskender, C.; Tarım, E.; Yalcinkaya, C. Prenatal diagnosis of right diaphragmatic eventration associated with fetal hydrops. *The journal of obstetrics and gynaecology research* **2012**, *38*, 858-862, doi:10.1111/j.1447-0756.2011.01831.x.
5. Kadam, R.; Prasad, V. Intrathoracic Gastric Volvulus presenting with GIT Bleed. *Journal of neonatal surgery* **2017**, *6*, 40, doi:10.21699/jns.v6i2.489.
6. Kizilcan, F.; Tanyel, F.C.; Hiçsönmez, A.; Büyükpamukçu, N. The long-term results of diaphragmatic plication. *Journal of pediatric surgery* **1993**, *28*, 42-44, doi:10.1016/s0022-3468(05)80351-3.
7. Lai, C.Y.; Hsu, W.M.; Peng, S.S.; Chou, H.C.; Chen, C.Y.; Hsieh, W.S.; Tsao, P.N. Tubular jejunal duplication, amelia and congenital diaphragmatic eventration in a neonate. *Clinical dysmorphology* **2010**, *19*, 169-171, doi:10.1097/MCD.0b013e328339ab0c.
8. Gunadi; Balela, N.; Marcellus; Fauzi, A.R.; Dwihantoro, A. Eventration of right diaphragm with an intrathoracic ectopic kidney: A case report. *Annals of medicine and surgery (2012)* **2020**, *57*, 179-182, doi:10.1016/j.amsu.2020.07.034.
9. Kasdallah, N.; Ben Salem, H.; Kbaier, H.; Blibech, S.; Douagi, M. Congenital diaphragmatic eventration complicated with neonatal gastric perforation. *La Tunisie medicale* **2017**, *95*, 136-138.
10. Mitsiakos, G.; Gavras, C.; Katsaras, G.N.; Chatziioannidis, I.; Mouravas, V.; Mitsiakou, C.; Lampropoulos, V.; Nikolaidis, N. Parvovirus B19 Intrauterine Infection and Eventration of the Diaphragm. *Prague Med Rep* **2022**, *123*, 48-55, doi:10.14712/23362936.2022.6.
11. Revencu, N.; Quenum, G.; Demaille, T.; Verellen, G.; De Paepe, A.; Verellen-Dumoulin, C. Congenital diaphragmatic eventration and bilateral uretero-hydronephrosis in a patient with neonatal Marfan syndrome caused by a mutation in exon 25 of the FBN1 gene and review of the literature. *European journal of pediatrics* **2004**, *163*, 33-37, doi:10.1007/s00431-003-1330-8.
12. Sallout, B.; Alshebli, D.; Sallout, L.; Al Baqawi, B.; Faden, M.S. Fetal Diaphragmatic Eventration: A Case Report. *Journal of obstetrics and gynaecology Canada : JOGC = Journal d'obstetrique et gynecologie du Canada : JOGC* **2021**, *43*, 993-997, doi:10.1016/j.jogc.2020.12.014.
13. Tsukahara, Y.; Ohno, Y.; Itakura, A.; Mizutani, S. Prenatal diagnosis of congenital diaphragmatic eventration by magnetic resonance imaging. *American journal of perinatology* **2001**, *18*, 241-244, doi:10.1055/s-2001-16992.
14. Yang, J.I. Left diaphragmatic eventration diagnosed as congenital diaphragmatic hernia by prenatal sonography. *Journal of clinical ultrasound : JCU* **2003**, *31*, 214-217, doi:10.1002/jcu.10157.



15. Zankl, A.; Osterheld, M.C.; Vial, Y.; Beurret, N.; Meuli, R.; Meagher-Villemure, K.; Roth-Kleiner, M. Right-sided diaphragmatic eventration: a rare cause of non-immune hydrops fetalis. *Neonatology* **2007**, *92*, 14-18, doi:10.1159/000098412.
16. Lewis, L.; Poojari, G.; Sanoj, K.M.; Kamath, S.P.; Kachane, Y.P. Neonatal arrhythmia with diaphragmatic eventration. *Indian journal of pediatrics* **2008**, *75*, 1083-1085, doi:10.1007/s12098-008-0097-3.
17. Shukla, R.M.; Maitra, S.K.; Patra, M.P.; Mandal, K.C.; Sarkar, R.; Mukhopadhyay, B.; Bhattacharya, M. Eventration of diaphragm with gastric duplication cysts: a rare association. *Indian journal of pediatrics* **2012**, *79*, 1377-1379, doi:10.1007/s12098-012-0688-x.
18. Sathanandam, S.; Kumar, T.K.; Feliz, A.; Knott-Craig, C.J. Successful Repair of Hypoplastic Left Heart Syndrome With Intact Atrial Septum, Congenital Diaphragm Hernia, and Anomalous Origin of Coronary Artery: Defying the Odds. *The Annals of thoracic surgery* **2016**, *102*, e55-57, doi:10.1016/j.athoracsur.2015.12.052.
19. Shehata, S.M.; El-Banna, I.A.; Gaber, A.A.; El-Samongy, A.M. Spondylothoracic dysplasia with diaphragmatic defect: a case report with literature review. *European journal of pediatric surgery : official journal of Austrian Association of Pediatric Surgery ... [et al] = Zeitschrift fur Kinderchirurgie* **2000**, *10*, 337-339, doi:10.1055/s-2008-1072387.
20. Steiner, R.D.; St, J.D.P.; Hopkin, R.J.; Kozielski, R.; Bove, K.E. Combination of diaphragmatic eventration and microphthalmia/anophthalmia is probably nonrandom. *American journal of medical genetics* **2002**, *108*, 45-50, doi:10.1002/ajmg.10167.
21. Stratton, R.F.; Young, R.S.; Heiman, H.S.; Carter, J.M. Fryns syndrome. *American journal of medical genetics* **1993**, *45*, 562-564, doi:10.1002/ajmg.1320450507.
22. Symbas, P.N.; Hatcher, C.R., Jr.; Waldo, W. Diaphragmatic eventration in infancy and childhood. *The Annals of thoracic surgery* **1977**, *24*, 113-119, doi:10.1016/s0003-4975(10)63718-6.
23. Takahashi, K.; Miyake, A.; Nakayashiro, M. Hypoplastic left heart syndrome in PAGOD syndrome. *Pediatrics international : official journal of the Japan Pediatric Society* **2014**, *56*, 422-424, doi:10.1111/ped.12280.
24. Vieira Martins, M.; Martins, D.S.; Oliveira, G. Diaphragmatic eventration as a first sign of Scimitar syndrome. *Cardiol Young* **2021**, *31*, 1870-1872, doi:10.1017/s1047951121001694.
25. Vijayaraghavan, S.B. Diaphragmatic eventration into the pericardial sac: sonographic diagnosis. *J Clin Ultrasound* **1988**, *16*, 510-512, doi:10.1002/jcu.1870160711.
26. Wayne, E.R.; Burrington, J.D.; Myers, D.N.; Cotton, E.; Block, W. Letter: Bilateral eventration of the diaphragm in a neonate with congenital cytomegalic inclusion disease. *J Pediatr* **1973**, *83*, 164-165, doi:10.1016/s0022-3476(73)80339-7.
27. Byun, J.; Kim, H.Y.; Noh, S.Y.; Kim, S.H.; Jung, S.E.; Lee, S.C.; Park, K.W. Neonatal gastric perforation: A single center experience. *World J Gastrointest Surg* **2014**, *6*, 151-155, doi:10.4240/wjgs.v6.i8.151.
28. Snyder, C.W.; Walford, N.E.; Danielson, P.D.; Chandler, N.M. A simple thoracoscopic plication technique for diaphragmatic eventration in neonates and infants: technical details and initial results. *Pediatr Surg Int* **2014**, *30*, 1013-1016, doi:10.1007/s00383-014-3580-0.

29. Ratan, S.K.; Grover, S.B. Lung agenesis in a neonate presenting with contralateral mediastinal shift. *Am J Perinatol* **2001**, *18*, 441-446, doi:10.1055/s-2001-18788.
30. Rais-Bahrami, K.; Gilbert, J.C.; Hartman, G.E.; Chandra, R.S.; Short, B.L. Right diaphragmatic eventration simulating a congenital diaphragmatic hernia. *Am J Perinatol* **1996**, *13*, 241-243, doi:10.1055/s-2007-994372.
31. Sciorra, L.J.; Hux, C.; Day-Salvadore, D.; Lee, M.L.; Mandelbaum, D.E.; Brady-Yasbin, S.; Frybury, J.; Mahoney, M.J.; Dimaio, M.S. Trisomy 5 mosaicism detected prenatally with an affected liveborn. *Prenat Diagn* **1992**, *12*, 477-482, doi:10.1002/pd.1970120602.
32. Yang, C.K.; Shih, J.C.; Hsu, W.M.; Peng, S.S.; Shyu, M.K.; Lee, C.N.; Hsieh, F.J. Isolated right diaphragmatic eventration mimicking congenital heart disease in utero. *Prenat Diagn* **2005**, *25*, 872-875, doi:10.1002/pd.1281.
33. Poole, C.A.; Rowe, M.I.; Fojaco, R.M.; Wexler, H.A. Congenital eventration of the septum transversum: a rare form of congenital diaphragmatic anomaly. *Pediatr Radiol* **1976**, *4*, 257-260, doi:10.1007/bf02461536.
34. Kapoor, V.; Wright, I.M. Congenital myotonic dystrophy with cardiac conduction defect and eventration of the diaphragm. *Pediatr Int* **2010**, *52*, e6-8, doi:10.1111/j.1442-200X.2009.02998.x.
35. Pearl, M. Sequestration of the lung. *Am J Dis Child* **1972**, *124*, 706-707, doi:10.1001/archpedi.1972.02110170084013.
36. Renault, F.; Nicot, F.; Liptai, Z.; Benharrats, T.; Fauroux, B. Congenital diaphragm weakness without neuromuscular disease. *Muscle Nerve* **2008**, *38*, 1201-1205, doi:10.1002/mus.20956.
37. Moerman, P.; Fryns, J.P.; Devlieger, H.; Van Assche, A.; Lauweryns, J. Congenital eventration of the diaphragm: an unusual cause of intractable neonatal respiratory distress with variable etiology. *Am J Med Genet* **1987**, *27*, 213-218, doi:10.1002/ajmg.1320270124.
38. Moccia, W.A.; Kaude, J.V.; Felman, A.H. Congenital eventration of the diaphragm. Diagnosis by ultrasound. *Pediatr Radiol* **1981**, *10*, 197-200, doi:10.1007/bf01001581.
39. Moazam, F.; Rodgers, B.M.; Talbert, J.L. Use of Teflon mesh for repair of abdominal wall defects in neonates. *J Pediatr Surg* **1979**, *14*, 347-351, doi:10.1016/s0022-3468(79)80497-2.
40. Gupta, S.; Wyllie, J.; Wright, C.; Turnbull, D.M.; Taylor, R.W. Mitochondrial respiratory chain defects and developmental diaphragmatic dysfunction in the neonatal period. *J Matern Fetal Neonatal Med* **2006**, *19*, 587-589, doi:10.1080/14767050600632623.
41. Merten, D.F.; Bowie, J.D.; Kirks, D.R.; Grossman, H. Anteromedial diaphragmatic defects in infancy: current approaches to diagnostic imaging. *Radiology* **1982**, *142*, 361-365, doi:10.1148/radiology.142.2.7054823.
42. Meine, F.; Grossman, H.; Forman, W.; Jackson, D. The radiographic findings in congenital cutis laxa. *Radiology* **1974**, *113*, 687-690, doi:10.1148/113.3.687.
43. Macayran, J.F.; Doroshov, R.W.; Phillips, J.; Sinow, R.M.; Furst, B.A.; Smith, L.M.; Lin, H.J. PAGOD syndrome: eighth case and comparison to animal models of congenital vitamin A deficiency. *Am J Med Genet* **2002**, *108*, 229-234, doi:10.1002/ajmg.10262.

44. Kozlov, Y.; Novozhilov, V. Thoracoscopic plication of the diaphragm in infants in the first 3 months of life. *J Laparoendosc Adv Surg Tech A* **2015**, *25*, 342-347, doi:10.1089/lap.2014.0205.
45. Joshi, A.; Kumar, M.; Acharya, A. Bilateral congenital eventration of diaphragm: keep in mind, the other side. *BMJ Case Rep* **2018**, *2018*, doi:10.1136/bcr-2018-226051.
46. N, S.; R, R.; H, S. Thoracoscopic Plication for Bilateral Eventration of Diaphragm in a Neonate. *J Neonatal Surg* **2015**, *4*, 35.
47. Heo, J.S.; Song, J.Y.; Choi, E.Y.; Kim, E.H.; Kim, J.H.; Park, S.E.; Jeon, J.H. Atypical Neonatal Marfan Syndrome with p.Glu1073Lys Mutation of FBN1: the First Case in Korea. *J Korean Med Sci* **2017**, *32*, 1-3, doi:10.3346/jkms.2017.32.1.1.
48. Gerard-Blanluet, M.; Port-Lis, M.; Baumann, C.; Perrin-Sabourin, L.; Ebrad, P.; Audry, G.; Delezoide, A.L.; Verloes, A. Unilateral agenesis of the abdominal wall musculature: An early muscle deficiency. *Am J Med Genet A* **2010**, *152a*, 2870-2874, doi:10.1002/ajmg.a.33708.
49. Garbaccio, C.; Gyepes, M.T.; Fonkalsrud, E.W. Malfunction of the intact diaphragm in infants and children. *Arch Surg* **1972**, *105*, 57-61, doi:10.1001/archsurg.1972.04180070055011.
50. Falade, A.G. Right diaphragmatic eventration simulating neonatal pleural effusion: a case report. *Ann Trop Paediatr* **1992**, *12*, 221-223, doi:10.1080/02724936.1992.11747572.
51. Ertan, G.; Sinzig, M.; Tekes, A.; Huisman, T.A. Congenital intercostal liver herniation: report on two neonates. *Eur J Pediatr Surg* **2010**, *20*, 196-198, doi:10.1055/s-0029-1237733.
52. Elberg, J.J.; Brok, K.E.; Pedersen, S.A.; Kock, K.E. Congenital bilateral eventration of the diaphragm in a pair of male twins. *J Pediatr Surg* **1989**, *24*, 1140-1141, doi:10.1016/s0022-3468(89)80096-x.
53. Ekkelkamp, S.; Vos, A. Bilateral eventration of the diaphragm. *Z Kinderchir* **1983**, *38*, 412-413, doi:10.1055/s-2008-1060020.
54. Rana, A.; Manchanda, S.; Dadhwal, V. Congenital focal eventration of the left hemidiaphragm: diagnostic dilemma resolved on prenatal MRI. *BMJ Case Rep* **2021**, *14*, doi:10.1136/bcr-2021-245771.
55. Dalvi, R.; Chari, G.; Fernandez, A.R. Congenital eventration of diaphragm. *Indian J Pediatr* **1990**, *57*, 125-127, doi:10.1007/bf02722146.
56. Krasemann, T.; van Osch-Gevers, L.; van de Woestijne, P. Cyanosis due to an isolated atrial septal defect: case report and review of the literature. *Cardiol Young* **2020**, *30*, 1741-1743, doi:10.1017/s1047951120002656.
57. Comstock, C.H. The antenatal diagnosis of diaphragmatic anomalies. *J Ultrasound Med* **1986**, *5*, 391-396, doi:10.7863/jum.1986.5.7.391.
58. Wenger, S.L.; McPherson, E.W. Interstitial deletion 2(p11.2p13): a rare chromosomal abnormality. *Clin Genet* **1997**, *52*, 61-62, doi:10.1111/j.1399-0004.1997.tb02516.x.
59. Donahue, M.L.; Rohena, L.O. Rare presentation of 6q16.3 microdeletion syndrome with severe upper limb reduction defects and duodenal atresia. *Clin Case Rep* **2017**, *5*, 905-914, doi:10.1002/ccr3.916.
60. Othersen, H.B., Jr.; Lorenzo, R.L. Diaphragmatic paralysis and eventration: newer approaches to diagnosis and operative correction. *J Pediatr Surg* **1977**, *12*, 309-315, doi:10.1016/0022-3468(77)90006-9.

61. Ein, S.H. Imperforate anus (anal agenesis) with rectal and sigmoid atresias in a newborn. *Pediatr Surg Int* **1997**, *12*, 449-451, doi:10.1007/bf01076966.
62. Berdon, W.E.; Baker, D.H.; Amoury, R. The role of pulmonary hypoplasia in the prognosis of newborn infants with diaphragmatic hernia and eventration. *Am J Roentgenol Radium Ther Nucl Med* **1968**, *103*, 413-421, doi:10.2214/ajr.103.2.413.
63. Shahrul Baharin, N.; Awadh Hashim, E.; Bin Huey, Q.; Chandran, S. Reinforcing the vascular disruption theory of the genesis of Poland's syndrome: a rare association of diaphragmatic eventration in a preterm infant with severe musculoskeletal defects. *BMJ Case Rep* **2021**, *14*, doi:10.1136/bcr-2020-238392.
64. Buxi, T.B.; Shubhra; Khanna, V.K.; Saxena, U.; Dutta, T. CT in complete congenital eventration of diaphragm with aplasia of lung. *Australas Radiol* **1992**, *36*, 72-74, doi:10.1111/j.1440-1673.1992.tb03082.x.
65. Iliff, P.J.; Eyre, J.A.; Westaby, S.; de Leval, M.; de Sousa, C. Neonatal pericardial effusion associated with central eventration of the diaphragm. *Arch Dis Child* **1983**, *58*, 147-149, doi:10.1136/ad.58.2.147.
66. Rao, S.H.; Natarajan, S.; Pallavi, V. Anesthetic management of staged thoracoscopic repair of bilateral eventration of diaphragm in a neonate. *Anesth Essays Res* **2016**, *10*, 118-121, doi:10.4103/0259-1162.165497.
67. Andijani, A.A.; Shajira, E.S.; Abushaheen, A.; Al-Matary, A. Microphthalmia Syndrome 9: Case Report of a Newborn Baby with Pulmonary Hypoplasia, Diaphragmatic Eventration, Microphthalmia, Cardiac Defect and Severe Primary Pulmonary Hypertension. *Am J Case Rep* **2019**, *20*, 354-360, doi:10.12659/ajcr.912873.
68. Baker, E.K.; Al Gharaibeh, F.N.; Bove, K.; Calvo-Garcia, M.A.; Shillington, A.; VandenHeuvel, K.; Cortezzo, D.E. A novel RYR1 variant in an infant with a unique fetal presentation of central core disease. *Am J Med Genet A* **2023**, doi:10.1002/ajmg.a.63188.
69. Chitayat, D.; Sroka, H.; Keating, S.; Colby, R.S.; Ryan, G.; Toi, A.; Blaser, S.; Viero, S.; Devisme, L.; Boute-Bénéjean, O.; et al. The PDAC syndrome (pulmonary hypoplasia/agenesis, diaphragmatic hernia/eventration, anophthalmia/microphthalmia, and cardiac defect) (Spear syndrome, Matthew-Wood syndrome): report of eight cases including a living child and further evidence for autosomal recessive inheritance. *Am J Med Genet A* **2007**, *143a*, 1268-1281, doi:10.1002/ajmg.a.31788.
70. Kosho, T.; Nakamura, T.; Kawame, H.; Baba, A.; Tamura, M.; Fukushima, Y. Neonatal management of trisomy 18: clinical details of 24 patients receiving intensive treatment. *Am J Med Genet A* **2006**, *140*, 937-944, doi:10.1002/ajmg.a.31175.
71. Robinson, A.E.; Gooneratne, N.S.; Blackburn, W.R.; Brogdon, B.G. Bilateral anteromedial defect of the diaphragm in children. *AJR Am J Roentgenol* **1980**, *135*, 301-306, doi:10.2214/ajr.135.2.301.
72. Miyano, G.; Morita, K.; Kaneshiro, M.; Miyake, H.; Koyama, M.; Nouse, H.; Yamoto, M.; Nakano, R.; Tanaka, Y.; Nishiguchi, T.; et al. Unilateral pulmonary agenesis associated with oesophageal atresia and tracheoesophageal fistula: A case report with prenatal diagnosis. *Afr J Paediatr Surg* **2015**, *12*, 86-88, doi:10.4103/0189-6725.151000.

73. Arts, P.; Garland, J.; Byrne, A.B.; Hardy, T.S.E.; Babic, M.; Feng, J.; Wang, P.; Ha, T.; King-Smith, S.L.; Schreiber, A.W.; et al. Paternal mosaicism for a novel PBX1 mutation associated with recurrent perinatal death: Phenotypic expansion of the PBX1-related syndrome. *Am J Med Genet A* **2020**, *182*, 1273-1277, doi:10.1002/ajmg.a.61541.
74. Wexler, H.A.; Poole, C.A. Neonatal diaphragmatic dysfunction. *AJR Am J Roentgenol* **1976**, *127*, 617-622, doi:10.2214/ajr.127.4.617.
75. Leyten, Q.H.; Renier, W.O.; Gabreëls, F.J.; ter Laak, H.J.; Hinkofer, L.H. Dystrophic myopathy of the diaphragm in a neonate with severe respiratory failure during infectious episodes. *Neuromuscul Disord* **1993**, *3*, 51-55, doi:10.1016/0960-8966(93)90041-h.
76. Danhaive, O.; Lozzi, S.; D'Amico, A.; Devito, R.; Boldrini, R.; Corchia, C.; Bagolan, P.; Bertini, E. Neonatal-onset nemaline myopathy mimicking congenital diaphragmatic hernia. *J Pediatr Surg* **2007**, *42*, E19-22, doi:10.1016/j.jpedsurg.2007.04.030.
77. Antoniou, D.; Soutis, M.; Karentzou, O. Cystic mesenchymal hamartoma arising in intrathoracic heterotopic liver: a case report. *J Pediatr Surg* **2012**, *47*, e49-51, doi:10.1016/j.jpedsurg.2012.07.057.
78. Verloes, A.; Perrin, L.; Delbecque, K.; Gonzales, M.; Demarche, M.; Dekoster, G. Congenital absence of the left pericardium and diaphragmatic defect in sibs. *Eur J Med Genet* **2010**, *53*, 133-135, doi:10.1016/j.ejmg.2010.02.007.
79. Inoue, S.; Odaka, A.; Muta, Y.; Takeuchi, Y.; Yamashita, T.; Kabe, K.; Sakurai, Y. Left hemidiaphragmatic elevation: Value of histology. *Journal of Pediatric Surgery Case Reports* **2020**, *60*, doi:10.1016/j.epsc.2020.101546.
80. Şahin, Y.; Kiper, P.; Alanay, Y.; Liehr, T.; Utine, G.E.; Boduroğlu, K. Partial monosomy 3q26.33-3q27.3 presenting with intellectual disability, facial dysmorphism, and diaphragm eventration: a case report. *Clin Dysmorphol* **2014**, *23*, 147-151, doi:10.1097/mcd.0000000000000042.
81. Mahalingam, H.; Babu, B.; Rangasami, R.; Suresh, S.; Suresh, I.; Andrew, C. Fetal magnetic resonance imaging in the evaluation of congenital diaphragmatic anomalies. *Egyptian Journal of Radiology and Nuclear Medicine* **2020**, *51*, doi:10.1186/s43055-020-00340-w.
82. Rodgers, B.M.; Hawks, P. Bilateral congenital eventration of the diaphragms: successful surgical management. *J Pediatr Surg* **1986**, *21*, 858-864, doi:10.1016/s0022-3468(86)80008-2.
83. Zainudin, Z.; Abdullah, F.I.S.; Hong, N.S.; Bahari, M.; Sim, I.C.G. A "near miss" congenital eventration of the right hemidiaphragm in a neonate: A case report. *Malaysian Journal of Medicine and Health Sciences* **2016**, *12*, 45-48.
84. Hasegawa, T.; Imura, K.; Kubota, A.; Kobayashi, T.; Inoue, M.; Hata, S.; Shimizu, I.; Suehara, N. Congenital diaphragmatic eventration detected by antenatal ultrasound: Rationale for early operation. *Pediatric Surgery International* **1994**, *9*, 405-406, doi:10.1007/BF01686016.
85. N'Guessen, G.; Stephens, F.D.; Pick, J. Congenital superior ectopic (thoracic) kidney. *Urology* **1984**, *24*, 219-228, doi:10.1016/0090-4295(84)90346-7.
86. Takahashi, T.; Okazaki, T.; Ochi, T.; Nishimura, K.; Lane, G.J.; Inada, E.; Yamataka, A. Thoracoscopic plication for diaphragmatic eventration in a neonate. *Ann Thorac Cardiovasc Surg* **2013**, *19*, 243-246, doi:10.5761/atcs.cr.12.01907.
87. Sun, J.; McGillivray, A.J.; Pinner, J.; Yan, Z.; Liu, F.; Bratkovic, D.; Thompson, E.; Wei, X.; Jiang, H.; Asan; et al. Diaphragmatic Eventration in Sisters with Asparagine Synthetase Deficiency: A Novel Homozygous ASNS Mutation and Expanded Phenotype. *JIMD Rep* **2017**, *34*, 1-9, doi:10.1007/8904\_2016\_3.

88. Ahmed, Z.; Mohyuddin, Z. Congenital bilateral diaphragmatic eventration--a rare anomaly with complicated perioperative care. *J Pak Med Assoc* **1998**, *48*, 221-225.
89. DiChiacchio, L.; Cappiello, C.D.; Greenspon, J. Extrapulmonary sequestration with a left internal thoracic arterial feeding vessel in an infant treated with video-assisted Thoracoscopic resection: a case report. *J Cardiothorac Surg* **2018**, *13*, 88, doi:10.1186/s13019-018-0775-9.
90. Park, W.H.; Choi, S.O.; Suh, S.J. Pediatric gastric volvulus--experience with 7 cases. *J Korean Med Sci* **1992**, *7*, 258-263, doi:10.3346/jkms.1992.7.3.258.
91. Huang, X.; Huang, H.; Liang, Y.; Jiang, H.; Pei, Y.; Xu, L.; Tang, W.; Li, Y. Modified sequential sac ligation and staged closure technique for the management of giant omphalocele. *J Pediatr Surg* **2021**, *56*, 1576-1582, doi:10.1016/j.jpedsurg.2020.11.031.
92. Veiga-Fernández, A.; Joigneau Prieto, L.; Álvarez, T.; Ruiz, Y.; Pérez, R.; Gámez, F.; Ortega Abad, V.; Yllana, F.; De León-Luis, J. Perinatal diagnosis and management of early-onset Marfan syndrome: case report and systematic review. *J Matern Fetal Neonatal Med* **2020**, *33*, 2493-2504, doi:10.1080/14767058.2018.1552935.
93. Jeanty, C.; Nien, J.K.; Espinoza, J.; Kusanovic, J.P.; Gonçalves, L.F.; Qureshi, F.; Jacques, S.; Lee, W.; Romero, R. Pleural and pericardial effusion: a potential ultrasonographic marker for the prenatal differential diagnosis between congenital diaphragmatic eventration and congenital diaphragmatic hernia. *Ultrasound Obstet Gynecol* **2007**, *29*, 378-387, doi:10.1002/uog.3958.
